# Supplementary material for: Neuromodulation for Peripheral Nerve Regeneration: Systematic Review of Mechanisms and In Vivo Highlights
Source: MDPI journal article supplement (doi:10.3390/biomedicines11041145), 2023-04-10
Supplement: s1 [file s1]

**Table S1.** PubMed Search Syntax.

| Search Syntax                                                                                                                                                                                                                                                                                                                                                                                                                                                                                                                                                                                                                                                                                                                                                                                                                                                                                                                                                                                                                                                                        | Results    |
|--------------------------------------------------------------------------------------------------------------------------------------------------------------------------------------------------------------------------------------------------------------------------------------------------------------------------------------------------------------------------------------------------------------------------------------------------------------------------------------------------------------------------------------------------------------------------------------------------------------------------------------------------------------------------------------------------------------------------------------------------------------------------------------------------------------------------------------------------------------------------------------------------------------------------------------------------------------------------------------------------------------------------------------------------------------------------------------|------------|
| <p>(<b>"Electric Stimulation"</b>[mesh] OR <b>"Electric Stimulation Therapy"</b>[mesh] OR <b>"Spinal Cord Stimulation"</b>[mesh] OR<br/> electrostimulat*[tiab] OR<br/> electromodulat*[tiab] OR<br/> neurostimulat*[tiab] OR<br/> neuromodulat*[tiab] OR electro-<br/> stimulat*[tiab] OR electro-modulat*[tiab] OR<br/> neuro-stimulat*[tiab] OR neuro-<br/> modulat*[tiab] OR ((electric[tiab] OR<br/> electrical[tiab] OR spinal*[tiab] OR dorsal-<br/> column*[tiab] OR dorsal-root*[tiab] OR<br/> peripheral-nerve*[tiab]) AND<br/> (stimulation*[tiab] OR stimulator*[tiab] OR<br/> modulation*[tiab] OR modulator*[tiab])))</p> <p>AND (<b>"Peripheral Nerves/injuries"</b>[mesh] OR<br/> <b>"Peripheral Nerve Injuries"</b>[mesh] OR<br/> ((peripheral-nerve*[tiab] OR<br/> epineurium*[tiab] OR endoneurium*[tiab])<br/> AND (injur*[tw] OR injuries[sh])))</p> <p>AND (<b>"Nerve Regeneration"</b>[mesh] OR<br/> ((nerve*[tiab] OR nerve-tissue[tiab] OR<br/> neural-tissue*[tiab] OR nervous-tissue*[tiab])<br/> AND (regenerat*[tiab])))</p> <p>AND English[filter]</p> | <p>811</p> |
